# Supplementary material for: Exploration and analysis of drug modes of action through feature integration
Source: Royal Society of Chemistry journal article supplement (doi:10.1039/c6mb00635c), 2017-01-16
Supplement: c6mb00635c1.xlsx [file c6mb00635c1.xlsx]

## Sheet: Top 56 prediction results
MoA-Category	DrugName	herf	Probability
Anti-Allergic Agents	TRAVOPROST	https://fdasis.nlm.nih.gov/srs/auto/WJ68R08KX9	1
Antihypertensive Agents	LOTEPREDNOL ETABONATE	https://fdasis.nlm.nih.gov/srs/auto/YEH1EZ96K6	1
Antineoplastic Agents	GEFITINIB	https://fdasis.nlm.nih.gov/srs/auto/S65743JHBS	1
Antiviral Agents	CEFAZOLIN	https://fdasis.nlm.nih.gov/srs/auto/IHS69L0Y4T	1
Cardiovascular Agents	LOTEPREDNOL ETABONATE	https://fdasis.nlm.nih.gov/srs/auto/YEH1EZ96K6	1
Dermatologic Agents	PREDNICARBATE	https://fdasis.nlm.nih.gov/srs/auto/V901LV1K7D	1
Enzyme Inhibitors	DOFETILIDE	https://fdasis.nlm.nih.gov/srs/auto/R4Z9X1N2ND	1
Enzyme Inhibitors	EPINEPHRINE	https://fdasis.nlm.nih.gov/srs/auto/YKH834O4BH	1
Enzyme Inhibitors	HYDROCHLOROTHIAZIDE	https://fdasis.nlm.nih.gov/srs/auto/0J48LPH2TH	1
Enzyme Inhibitors	METHYLDOPA ANHYDROUS	https://fdasis.nlm.nih.gov/srs/auto/M4R0H12F6M	1
Enzyme Inhibitors	MORICIZINE	https://fdasis.nlm.nih.gov/srs/auto/2GT1D0TMX1	1
Hypoglycemic Agents	PHENINDIONE	https://fdasis.nlm.nih.gov/srs/auto/5M7Y6274ZE	1
Antineoplastic_Agents	BOSUTINIB	https://fdasis.nlm.nih.gov/srs/auto/5018V4AEZ0	0.667
Enzyme_Inhibitors	BOSUTINIB	https://fdasis.nlm.nih.gov/srs/auto/5018V4AEZ0	0.667
Protein_Kinase_Inhibitors	BOSUTINIB	https://fdasis.nlm.nih.gov/srs/auto/5018V4AEZ0	0.667
Anti-Bacterial Agents	FAMOTIDINE	https://fdasis.nlm.nih.gov/srs/auto/5QZO15J2Z8	0.5
Anti-Bacterial Agents	LATANOPROST	https://fdasis.nlm.nih.gov/srs/auto/6Z5B6HVF6O	0.5
Anti-Bacterial Agents	SOLIFENACIN SUCCINATE	https://fdasis.nlm.nih.gov/srs/auto/KKA5DLD701	0.5
Anticoagulants	ACETOHEXAMIDE	https://fdasis.nlm.nih.gov/srs/auto/QGC8W08I6I	0.5
Anticonvulsants	FENOPROFEN	https://fdasis.nlm.nih.gov/srs/auto/RA33EAC7KY	0.5
Anticonvulsants	NABUMETONE	https://fdasis.nlm.nih.gov/srs/auto/LW0TIW155Z	0.5
Anticonvulsants	PERMETHRIN	https://fdasis.nlm.nih.gov/srs/auto/509F88P9SZ	0.5
Anticonvulsants	PROFENAMINE	https://fdasis.nlm.nih.gov/srs/auto/7WI4P02YN1	0.5
Anti-Infective Agents	FAMOTIDINE	https://fdasis.nlm.nih.gov/srs/auto/5QZO15J2Z8	0.5
Anti-Infective Agents	LATANOPROST	https://fdasis.nlm.nih.gov/srs/auto/6Z5B6HVF6O	0.5
Anti-Infective Agents	SOLIFENACIN SUCCINATE	https://fdasis.nlm.nih.gov/srs/auto/KKA5DLD701	0.5
Anti-Inflammatory Agents	AMCINONIDE	https://fdasis.nlm.nih.gov/srs/auto/423W026MA9	0.5
Carbonic Anhydrase Inhibitors	TROPICAMIDE	https://fdasis.nlm.nih.gov/srs/auto/N0A3Z5XTC6	0.5
Central Nervous System Agents	FENOPROFEN	https://fdasis.nlm.nih.gov/srs/auto/RA33EAC7KY	0.5
Central Nervous System Agents	NABUMETONE	https://fdasis.nlm.nih.gov/srs/auto/LW0TIW155Z	0.5
Central Nervous System Agents	PERMETHRIN	https://fdasis.nlm.nih.gov/srs/auto/509F88P9SZ	0.5
Central Nervous System Agents	PROFENAMINE	https://fdasis.nlm.nih.gov/srs/auto/7WI4P02YN1	0.5
Central Nervous System Agents	TOCAINIDE	https://fdasis.nlm.nih.gov/srs/auto/27DXO59SAN	0.5
Dermatologic Agents	AMCINONIDE	https://fdasis.nlm.nih.gov/srs/auto/423W026MA9	0.5
Diuretics	BOSENTAN ANHYDROUS	https://fdasis.nlm.nih.gov/srs/auto/XUL93R30K2	0.5
Enzyme Inhibitors	TROPICAMIDE	https://fdasis.nlm.nih.gov/srs/auto/N0A3Z5XTC6	0.5
Hematologic Agents	ACETOHEXAMIDE	https://fdasis.nlm.nih.gov/srs/auto/QGC8W08I6I	0.5
Membrane Transport Modulators	BOSENTAN ANHYDROUS	https://fdasis.nlm.nih.gov/srs/auto/XUL93R30K2	0.5
Natriuretic Agents	BOSENTAN ANHYDROUS	https://fdasis.nlm.nih.gov/srs/auto/XUL93R30K2	0.5
Sodium Potassium Chloride Symporter Inhibitors	BOSENTAN ANHYDROUS	https://fdasis.nlm.nih.gov/srs/auto/XUL93R30K2	0.5
Cardiovascular Agents	EZETIMIBE	https://fdasis.nlm.nih.gov/srs/auto/EOR26LQQ24	0.474
Central Nervous System Agents	RIVASTIGMINE	https://fdasis.nlm.nih.gov/srs/auto/PKI06M3IW0	0.449
Antineoplastic Agents	CELECOXIB	https://fdasis.nlm.nih.gov/srs/auto/JCX84Q7J1L	0.444
Anti-Infective Agents	TELITHROMYCIN	https://fdasis.nlm.nih.gov/srs/auto/KI8H7H19WL	0.429
Central Nervous System Agents	PIROXICAM	https://fdasis.nlm.nih.gov/srs/auto/13T4O6VMAM	0.429
Neurotransmitter Agents	PIROXICAM	https://fdasis.nlm.nih.gov/srs/auto/13T4O6VMAM	0.429
Central Nervous System Agents	ALLOPURINOL	https://fdasis.nlm.nih.gov/srs/auto/63CZ7GJN5I	0.409
Neurotransmitter Agents	ALLOPURINOL	https://fdasis.nlm.nih.gov/srs/auto/63CZ7GJN5I	0.409
Adrenal Cortex Hormones	HYDROCORTISONE BUTYRATE	https://fdasis.nlm.nih.gov/srs/auto/05RMF7YPWN	0.4
Anti-Infective Agents	IMIQUIMOD	https://fdasis.nlm.nih.gov/srs/auto/P1QW714R7M	0.4
Anti-Inflammatory Agents	HYDROCORTISONE BUTYRATE	https://fdasis.nlm.nih.gov/srs/auto/05RMF7YPWN	0.4
Central Nervous System Agents	AZTREONAM	https://fdasis.nlm.nih.gov/srs/auto/G2B4VE5GH8	0.4
Glucocorticoids	HYDROCORTISONE BUTYRATE	https://fdasis.nlm.nih.gov/srs/auto/05RMF7YPWN	0.4
Hormones	HYDROCORTISONE BUTYRATE	https://fdasis.nlm.nih.gov/srs/auto/05RMF7YPWN	0.4
Hormones, Hormone Substitutes, and Hormone Antagonists	HYDROCORTISONE BUTYRATE	https://fdasis.nlm.nih.gov/srs/auto/05RMF7YPWN	0.4
Hypoglycemic Agents	ORLISTAT	https://fdasis.nlm.nih.gov/srs/auto/95M8R751W8	0.4

## Sheet: Peformance for different method
Performance comparisons of different learning methods.
Method	AUC	Recall	Precision	ACC
SVM	0.62	0.807	0.709	0.598
Random Forest	0.61	0.69	0.635	0.61
Logistic Regression	0.63	0.791	0.826	0.552
K-Nearest Neighbors	0.58	0.654	0.59	0.408
Probability Ensemble Method	0.65	0.82	0.715	0.618
